# Supplementary material
Source: PubMed Central journal article supplement (PMC4667707)
Supplement: NIHMS740390-supplement-Supp_Table_S1-S4.pdf [file NIHMS740390-supplement-Supp_Table_S1-S4.pdf]

**Supp. Table S1. Post-hoc analysis of the ANOVA statistics for Figure 2: Immunoblot**

| <b>B. Total hERG Protein</b>                 |                           |    |
|----------------------------------------------|---------------------------|----|
| ANOVA P value                                | p= 0.7548                 |    |
| Post-Hoc Analysis                            | WT hERG v. 50/50 Mix      | NS |
|                                              | WT hERG v. p. Asp219Val   | NS |
|                                              | 50/50 Mix v. p Asp.219Val | NS |
|                                              |                           |    |
| <b>C. Mature/Immature hERG Protein Ratio</b> |                           |    |
| ANOVA P value                                | p= 0.8808                 |    |
| Post-Hoc Analysis                            | WT hERG v. 50/50 Mix      | NS |
|                                              | WT hERG v. p. Asp219Val   | NS |
|                                              | 50/50 Mix v. p Asp.219Val | NS |

These analyses demonstrate that none of the differences between the WT hERG, 50/50 mix or p. Asp219Val hERG protein on immunoblot are significant, either for **B)** total protein or **C)** ratio of mature to immature hERG.

**Supp. Table S2. Post-hoc analysis of the ANOVA statistics for Figure 3: Activation**

| <b>B. Normalized Current Density</b>       |                            |          |
|--------------------------------------------|----------------------------|----------|
| ANOVA P value                              | p= 0.2078                  |          |
| Post-Hoc Analysis                          | WT hERG v. 50/50 Mix       | NS       |
|                                            | WT hERG v. p. Asp219Val    | NS       |
|                                            | 50/50 Mix v. p. Asp.219Val | NS       |
|                                            |                            |          |
| <b>D. Voltage Dependence of Activation</b> |                            |          |
| ANOVA P value                              | p <0.001                   |          |
| Post-Hoc Analysis                          | WT hERG v. 50/50 Mix       | p <0.05  |
|                                            | WT hERG v. p. Asp219Val    | p <0.001 |
|                                            | 50/50 Mix v. p. Asp.219Val | p <0.001 |

**B)** These analyses demonstrate that none of the differences between the current densities for WT hERG, 50/50 mix or p. Asp219Val hERG protein are significant. **D)** This post-hoc analysis demonstrates that the differences between the  $V_{1/2}$  for the WT, 50/50 mix or p. Asp219Val hERG in their voltage dependence of activation are all significant.

**Supp. Table S3. Post-hoc analysis of the ANOVA statistics for Figure 4: Inactivation**

| <b>A. Steady State Inactivation</b> |                            |               | <b>C. Recovery from Inactivation</b> |              |               |
|-------------------------------------|----------------------------|---------------|--------------------------------------|--------------|---------------|
| ANOVA P value                       | p <0.001                   |               | ANOVA                                | Voltage (mV) | ANOVA p Value |
| Post-Hoc Analysis                   | WT hERG v. 50/50 Mix       | p <0.001      |                                      | -60          | p <0.05       |
|                                     | WT hERG v. p. Asp219Val    | p <0.001      |                                      | -50          | p <0.001      |
|                                     | 50/50 Mix v. p. Asp.219Val | NS            |                                      | -40          | p <0.001      |
|                                     |                            |               |                                      | -30          | p <0.001      |
| <b>B. Onset of Inactivation</b>     |                            |               |                                      |              |               |
| ANOVA                               | Voltage (mV)               | ANOVA p Value | WT hERG v. 50/50 Mix                 | Voltage (mV) |               |
|                                     | -20                        | NS            |                                      | -60          | p <0.05       |
|                                     | -10                        | NS            |                                      | -50          | p <0.001      |
|                                     | 0                          | NS            |                                      | -40          | p <0.001      |
|                                     | 10                         | NS            |                                      | -30          | p <0.001      |
|                                     | 20                         | NS            |                                      |              |               |
|                                     | 30                         | NS            | WT hERG v. p. Asp219Val              | Voltage (mV) |               |
|                                     | 40                         | NS            |                                      | -60          | p <0.05       |
|                                     | 50                         | p <0.05       |                                      | -50          | p <0.001      |
|                                     | 60                         | p <0.05       |                                      | -40          | p <0.001      |
|                                     | 70                         | NS            |                                      | -30          | NS            |
| Post-Hoc Analysis                   |                            |               |                                      |              |               |
|                                     |                            |               | 50/50 Mix v. p. Asp.219Val           | Voltage (mV) |               |
| WT hERG v. 50/50 Mix                | Voltage (mV)               |               |                                      | -60          | NS            |
|                                     | -20                        | NS            |                                      | -50          | NS            |
|                                     | -10                        | NS            |                                      | -40          | p <0.001      |
|                                     | 0                          | NS            |                                      | -30          | p <0.001      |
|                                     | 10                         | NS            |                                      |              |               |
|                                     | 20                         | NS            |                                      |              |               |
|                                     | 30                         | NS            |                                      |              |               |
|                                     | 40                         | NS            |                                      |              |               |
|                                     | 50                         | p <0.05       |                                      |              |               |
|                                     | 60                         | p <0.05       |                                      |              |               |

|                               |              |    |
|-------------------------------|--------------|----|
|                               | 70           | NS |
| WT hERG v. p.<br>Asp219Val    | Voltage (mV) |    |
|                               | -20          | NS |
|                               | -10          | NS |
|                               | 0            | NS |
|                               | 10           | NS |
|                               | 20           | NS |
|                               | 30           | NS |
|                               | 40           | NS |
|                               | 50           | NS |
|                               | 60           | NS |
|                               | 70           | NS |
| 50/50 Mix v. p.<br>Asp.219Val | Voltage (mV) |    |
|                               | -20          | NS |
|                               | -10          | NS |
|                               | 0            | NS |
|                               | 10           | NS |
|                               | 20           | NS |
|                               | 30           | NS |
|                               | 40           | NS |
|                               | 50           | NS |
|                               | 60           | NS |
|                               | 70           | NS |

**A)** These analyses demonstrate that the differences between the steady state inactivation  $V_{1/2}$  for WT hERG and 50/50 mix, as well as WT hERG and p. Asp219Val hERG protein are significant, while the differences between 50/50 mix and p. Asp219Val hERG are not significant. **B)** This post-hoc analysis demonstrates that the differences between the onsets of inactivation for the WT and 50/50 mix as well as WT hERG and p. Asp219Val hERG are significant at voltages -50mV and -60 mV, while the differences between 50/50 mix and p. Asp219Val hERG are not significant. **C)** This post-hoc analysis demonstrates that the differences between the WT and 50/50 mix in recovery from inactivation are significant at all voltages tested. The differences in WT hERG and p. Asp219Val hERG in recovery from inactivation are significant at voltages -60mV- -40 mV, and the differences between 50/50 mix and p. Asp219Val hERG are significant at -40mV and -30 mV.

**Supp. Table S4. Post-hoc analysis of the ANOVA statistics for Figure 5: Deactivation**

| <i>B. Deactivation Time Constants</i> |              |               | <i>C. Ratio of Tau Fast to Total Deactivation Time</i> |              |               |
|---------------------------------------|--------------|---------------|--------------------------------------------------------|--------------|---------------|
| <i>Tau Slow</i>                       |              |               | ANOVA                                                  | Voltage (mV) | ANOVA p Value |
| ANOVA                                 | Voltage (mV) | ANOVA p Value |                                                        | -100         | NS            |
|                                       | -100         | NS            |                                                        | -90          | NS            |
|                                       | -90          | NS            |                                                        | -80          | NS            |
|                                       | -80          | NS            |                                                        | -70          | p <0.001      |
|                                       | -70          | NS            |                                                        | -60          | p <0.05       |
|                                       | -60          | NS            |                                                        | -50          | p <0.001      |
|                                       | -50          | NS            |                                                        | -40          | p <0.001      |
|                                       | -40          | NS            |                                                        |              |               |
|                                       |              |               | Post-Hoc Analysis                                      |              |               |
| Post-Hoc Analysis                     |              |               |                                                        |              |               |
|                                       |              |               | WT hERG v. 50/50 Mix                                   | Voltage (mV) |               |
| WT hERG v. 50/50 Mix                  | Voltage (mV) |               |                                                        | -100         | NS            |
|                                       | -100         | NS            |                                                        | -90          | NS            |
|                                       | -90          | NS            |                                                        | -80          | NS            |
|                                       | -80          | NS            |                                                        | -70          | p <0.001      |
|                                       | -70          | NS            |                                                        | -60          | NS            |
|                                       | -60          | NS            |                                                        | -50          | p <0.001      |
|                                       | -50          | NS            |                                                        | -40          | p <0.001      |
|                                       | -40          | NS            | WT hERG v. p. Asp219Val                                | Voltage (mV) |               |
| WT hERG v. p. Asp219Val               | Voltage (mV) |               |                                                        | -100         | NS            |
|                                       | -100         | NS            |                                                        | -90          | NS            |
|                                       | -90          | NS            |                                                        | -80          | NS            |
|                                       | -80          | NS            |                                                        | -70          | p <0.001      |
|                                       | -70          | NS            |                                                        | -60          | p <0.001      |
|                                       | -60          | NS            |                                                        | -50          | p <0.001      |
|                                       | -50          | NS            |                                                        | -40          | p <0.001      |
|                                       | -40          | NS            | 50/50 Mix v. p Asp.219Val                              | Voltage (mV) |               |

|                              |                 |                  |  |      |          |
|------------------------------|-----------------|------------------|--|------|----------|
| 50/50 Mix v. p<br>Asp.219Val | Voltage<br>(mV) |                  |  |      |          |
|                              | -100            | NS               |  | -100 | NS       |
|                              | -90             | NS               |  | -90  | NS       |
|                              | -80             | NS               |  | -80  | NS       |
|                              | -70             | NS               |  | -70  | NS       |
|                              | -60             | NS               |  | -60  | NS       |
|                              | -50             | NS               |  | -50  | p <0.001 |
|                              | -40             | NS               |  | -40  | NS       |
|                              |                 |                  |  |      |          |
| <i>Tau Fast</i>              |                 |                  |  |      |          |
| ANOVA                        | Voltage<br>(mV) | ANOVA<br>p Value |  |      |          |
|                              | -100            | NS               |  |      |          |
|                              | -90             | p <0.001         |  |      |          |
|                              | -80             | p <0.001         |  |      |          |
|                              | -70             | p <0.001         |  |      |          |
|                              | -60             | p <0.001         |  |      |          |
|                              | -50             | p <0.001         |  |      |          |
|                              | -40             | p <0.001         |  |      |          |
|                              |                 |                  |  |      |          |
| Post-Hoc<br>Analysis         |                 |                  |  |      |          |
|                              |                 |                  |  |      |          |
| WT hERG v.<br>50/50 Mix      | Voltage<br>(mV) |                  |  |      |          |
|                              | -100            | NS               |  |      |          |
|                              | -90             | p <0.001         |  |      |          |
|                              | -80             | p <0.001         |  |      |          |
|                              | -70             | p <0.001         |  |      |          |
|                              | -60             | p <0.001         |  |      |          |
|                              | -50             | p <0.001         |  |      |          |
|                              | -40             | p <0.001         |  |      |          |
|                              |                 |                  |  |      |          |
| WT hERG v.<br>p. Asp219Val   | Voltage<br>(mV) |                  |  |      |          |
|                              | -100            | NS               |  |      |          |
|                              | -90             | p <0.001         |  |      |          |
|                              | -80             | p <0.001         |  |      |          |
|                              | -70             | p <0.001         |  |      |          |
|                              | -60             | p <0.001         |  |      |          |
|                              | -50             | p <0.001         |  |      |          |
|                              | -40             | p <0.001         |  |      |          |

| 50/50 Mix v. p<br>Asp.219Val | Voltage<br>(mV) |    |
|------------------------------|-----------------|----|
|                              | -100            | NS |
|                              | -90             | NS |
|                              | -80             | NS |
|                              | -70             | NS |
|                              | -60             | NS |
|                              | -50             | NS |
|                              | -40             | NS |

**B)** These analyses demonstrate that none of the differences in the Tau Slow time constant for WT hERG, 50/50 mix, and p. Asp219Val hERG protein are significant at any voltage. This post-hoc testing does demonstrate significant differences in the Tau Fast time constant between WT hERG and 50/50 mix at voltages -90 mV - -40 mV, as well as significant differences between the WT hERG and p. Asp219Val hERG at voltages -90mV - -40mV. There is not a significant difference in Tau Fast time constants between 50/50 Mix and p. Asp219Val hERG. **C)** Post-hoc analysis demonstrates that the differences between ratios of Tau Fast to total deactivation time is significant at voltages -70- -40 mV. These differences are significant between WT hERG and 50/50 mix at -70 mV, -50 mV and -40 mV, between WT hERG and p. Asp219Val from -70 mV- -40mV and between 50/50 mix and p. Asp219Val at -50 mV.
